# Supplementary material
Source: publisher figshare collection journal article supplement (https://acs.figshare.com/ndownloader/files/26712407)
Supplement: Supplementary file 1 [file 26712407]

# Theoretical Study on Tuning Band Gap and Electronic Properties of Atomically Thin Nanostructured MoS<sub>2</sub>/Metal Cluster Heterostructures

Saju Joseph,<sup>†,\*</sup> Simil Thomas,<sup>#</sup> Jainy Mohan,<sup>†</sup> Anusha Saji Kumar,<sup>§</sup> Sruthi Thulaseedharan Jayasree,<sup>§</sup> Sabu Thomas,<sup>†,‡</sup> and Nandakumar Kalarikkal<sup>†,§,\*</sup>

<sup>†</sup>International and Inter University Centre for Nanoscience and Nanotechnology, Mahatma Gandhi University, Kottayam, 686560, Kerala, India

<sup>#</sup>Department of Physics, Government College Nedumangad, Trivandrum, 695541, Kerala, India

<sup>§</sup>School of Pure and Applied Physics, Mahatma Gandhi University, Kottayam, 686560, Kerala, India

<sup>‡</sup>School of Chemical Sciences, Mahatma Gandhi University, Kottayam, 686560, Kerala, India

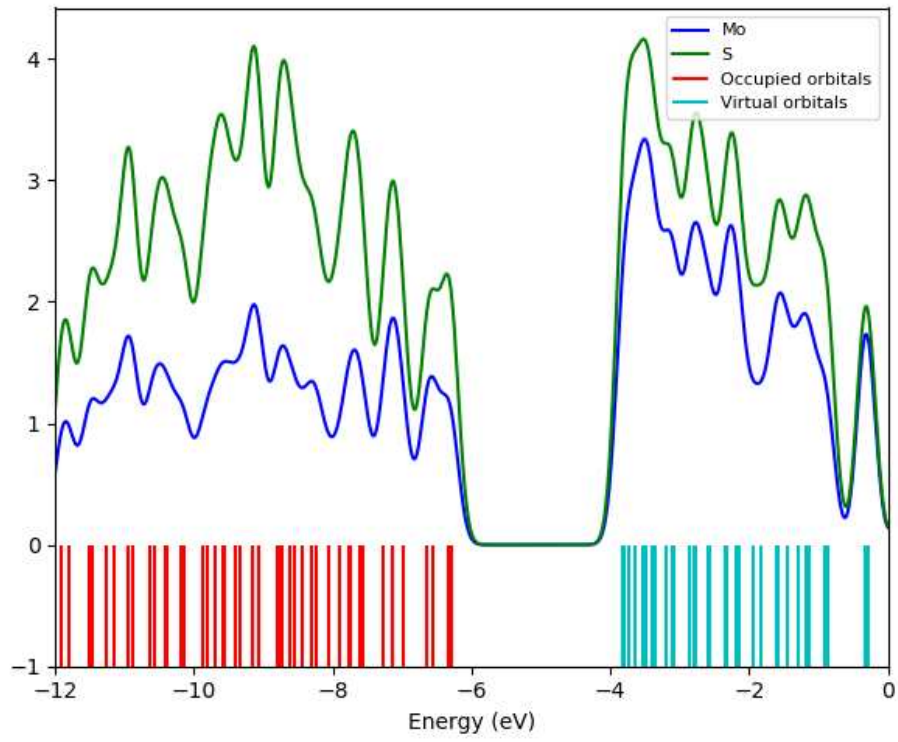

Figure 1: Density of states (DOS) of MoS<sub>2</sub>.

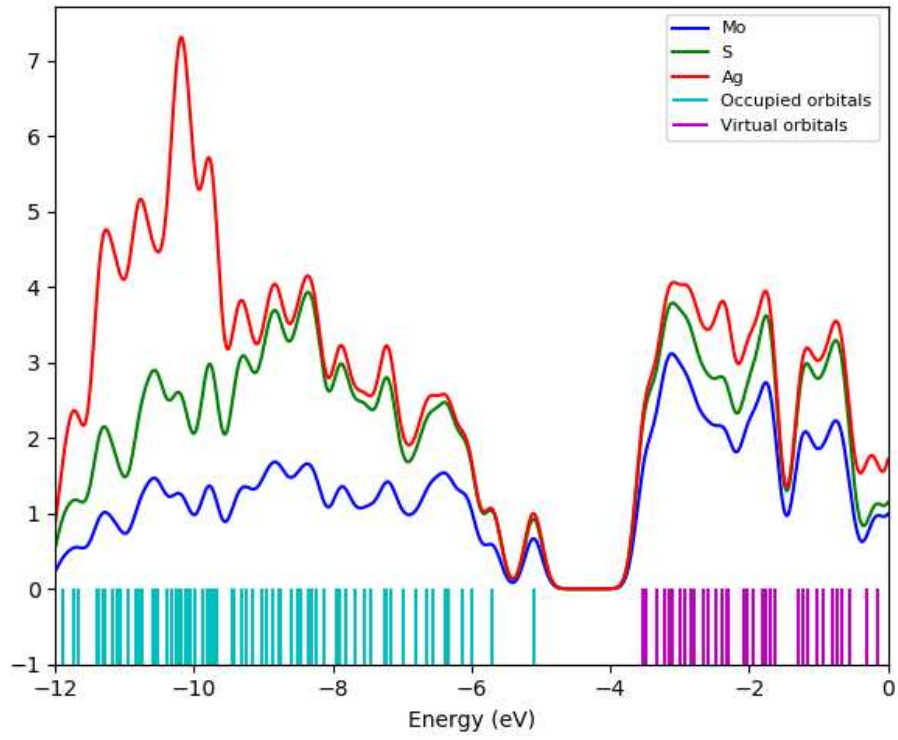

Figure 2: Density of states (DOS) of Silver/MoS<sub>2</sub>.

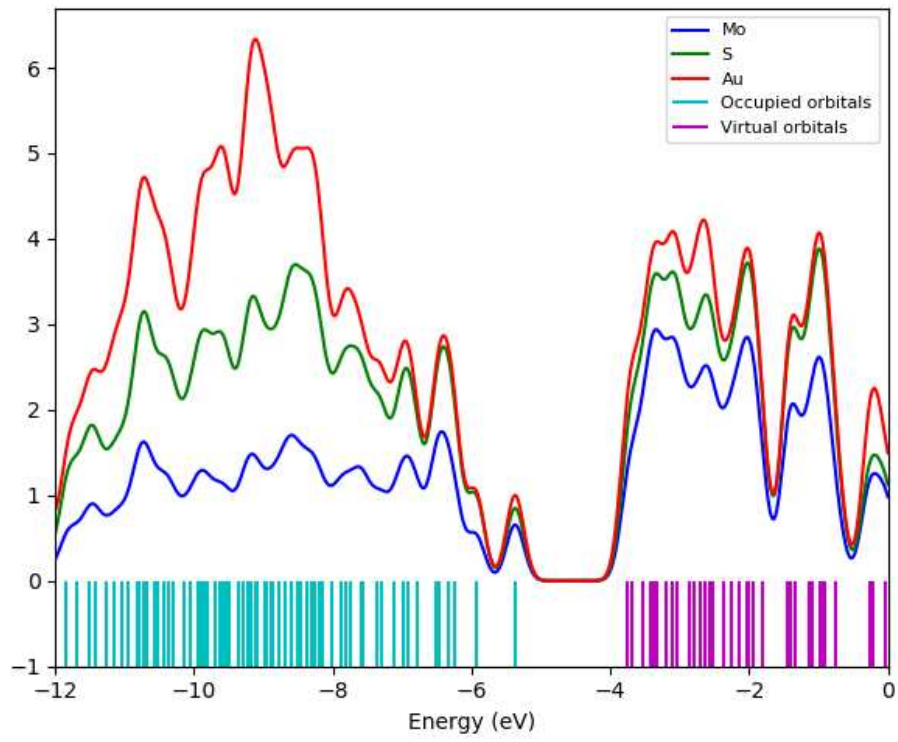

Figure 3: Density of states (DOS) of Gold/MoS<sub>2</sub>.
